# Supplementary material for: Activation of Tenofovir Alafenamide and Sofosbuvir in the Human Lung and Its Implications in the Development of Nucleoside/Nucleotide Prodrugs for Treating SARS-CoV-2 Pulmonary Infection
Source: MDPI journal article supplement (doi:10.3390/pharmaceutics13101656), 2021-10-11
Supplement: s1 [file s1]

# Supplementary Materials: Activation of Tenofovir Alafenamide and Sofosbuvir in the Human Lung and Its Implications in the Development of Nucleoside/Nucleotide Prodrugs for Treating SARS-CoV-2 Pulmonary Infection

Jiapeng Li, Shuhan Liu, Jian Shi and Hao-Jie Zhu

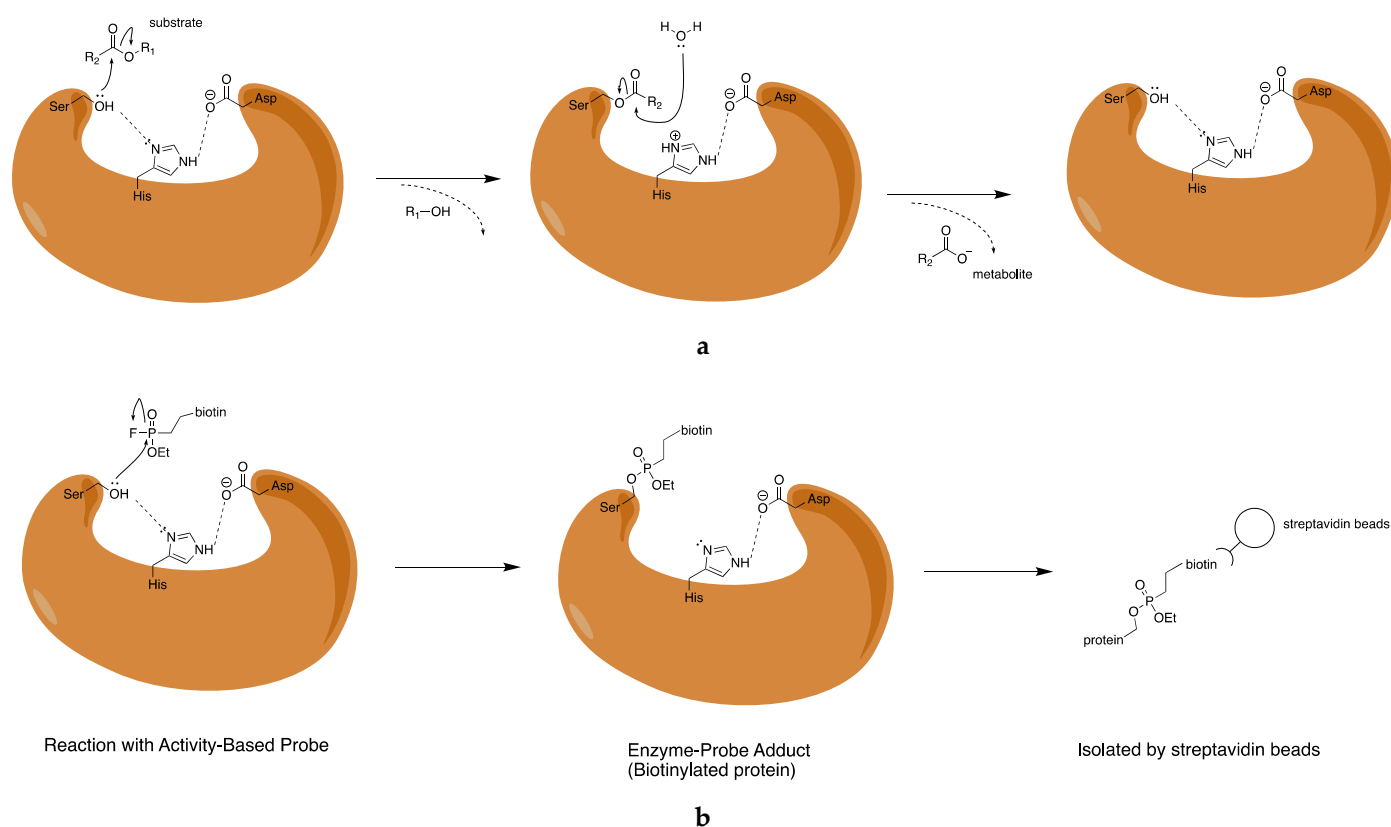

**Figure S1.** Reaction of serine hydrolases with an ester substrate (a) and biotin activity-based probe (b) via nucleophilic attacking [1].

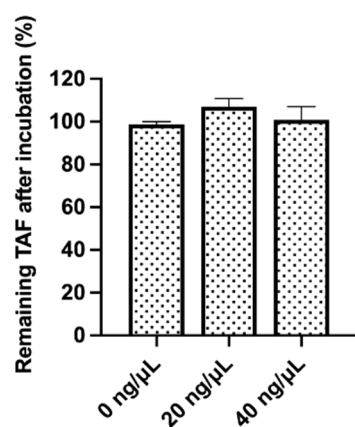

**Figure S2.** rhLYPLA1 showed no activity for TAF hydrolysis. 20 μM TAF was incubated with 20 and 40 ng/μL rhLYPLA1 in Tris pH 7.5 buffer at 37°C for 30 min. No significant reduction of TAF after incubations was identified.

**Table S1.** Demographic information of the tissue S9 donors.

| Organ | Total sample number | Age (year)     | Sex/ethnicity (number of samples)               |
|-------|---------------------|----------------|-------------------------------------------------|
| Lung  | 4                   | 22, 37, 49, 75 | M/C (1); M/H (1); F/C (1); F/AA (1).            |
| Liver | 50                  | 11-85          | M/C (26); M/H (3); M/AA (1); F/C (19); F/A (1). |

M = male; F = female. C = caucasian; H = hispanic; A = Asian; AA = African American.

**Table S2.** The gradient conditions of LC-MS/MS analysis.

| Time (min) | A (%) | B (%) |
|------------|-------|-------|
| 0          | 97    | 3     |
| 68         | 70    | 30    |
| 73         | 60    | 40    |
| 75         | 20    | 80    |
| 78         | 20    | 80    |
| 79         | 97    | 3     |
| 90         | end   | end   |

Mobile phase: A: water containing 0.1% formic acid; B: acetonitrile containing 0.1% formic acid.

**Table 3.** Meta-analysis of the protein abundance of HINT1 in the human lung and liver.

| Enzyme resource                             | Sample size                        | HINT1 Abundance <sup>a</sup>      | Study reference |
|---------------------------------------------|------------------------------------|-----------------------------------|-----------------|
| Pooled HLungS9                              | 4 donors, triplicate measurement   | 0.165 ± 0.009 µg/mg total protein | [2]             |
| Pooled HLS9                                 | 200 donors, triplicate measurement | 0.588 ± 0.010 µg/mg total protein |                 |
| HLung S9                                    | n = 3                              | 2.4 ± 1.2 µg/mg total protein     | [3]             |
| HLS9                                        | n = 3                              | 4.5 ± 1.7 µg/mg total protein     |                 |
| Primary human NHBE cells                    | n = 3                              | 1.0 ± 0.3 µg/mg total protein     | [4]             |
| Primary human TBEC cells                    | n = 4                              | 0.802 ± 0.039 µg/mg total protein |                 |
| Primary human hepatocytes                   | n = 7                              | 0.50 ± 0.10 µg/mg total protein   | [5]             |
| Lung tissue autopsy from COVID-19 patients  | n = 30                             | 1.011 ± 0.721                     | [6]             |
| Liver tissue autopsy from COVID-19 patients | n = 24                             | 1.412 ± 0.328                     |                 |
| A549 cell line (lung cancer)                | n = 3                              | 0.919                             | [7]             |
| Huh-7 cell line (liver cancer)              | n = 3                              | 1.14                              |                 |

a: The unit (µg/mg total protein) is only applicable to absolute quantification data, is not applicable to the relative data obtained from the studies by Nie X. *et al.* [6] and Nusinow, D. P. *et al.* [7].

## References

1. Tallman, K. R.; Levine, S. R.; Beatty, K. E., Small-Molecule Probes Reveal Esterases with Persistent Activity in Dormant and Reactivating Mycobacterium tuberculosis. *ACS Infectious Diseases* **2016**, *2*, (12), 936–944.
2. Li, J.; Liu, S.; Shi, J.; Wang, X.; Xue, Y.; Zhu, H.-J., Tissue-Specific Proteomics Analysis of Anti-COVID-19 Nucleoside and Nucleotide Prodrug-Activating Enzymes Provides Insights into the Optimization of Prodrug Design and Pharmacotherapy Strategy. *ACS Pharmacology & Translational Science* **2021**, *4*, (2), 870–887.
3. Li, R.; Liclican, A.; Xu, Y.; Pitts, J.; Niu, C.; Zhang, J.; Kim, C.; Zhao, X.; Soohoo, D.; Babusis, D.; Yue, Q.; Ma, B.; Murray Bernard, P.; Subramanian, R.; Xie, X.; Zou, J.; Bilello John, P.; Li, L.; Schultz Brian, E.; Sakowicz, R.; Smith Bill, J.; Shi, P.-Y.; Murakami, E.; Feng Joy, Y., Key Metabolic Enzymes Involved in Remdesivir Activation in Human Lung Cells. *Antimicrobial Agents and Chemotherapy* **2021**, *0*, (ja), AAC.00602–21.
4. Foster, M. W.; Gwinn, W. M.; Kelly, F. L.; Brass, D. M.; Valente, A. M.; Moseley, M. A.; Thompson, J. W.; Morgan, D. L.; Palmer, S. M., Proteomic Analysis of Primary Human Airway Epithelial Cells Exposed to the Respiratory Toxicant Diacetyl. *Journal of Proteome Research* **2017**, *16*, (2), 538–549.

5. Wiśniewski, J. R.; Vildhede, A.; Norén, A.; Artursson, P., In-depth quantitative analysis and comparison of the human hepatocyte and hepatoma cell line HepG2 proteomes. *Journal of Proteomics* **2016**, *136*, 234-247.
6. Nie, X.; Qian, L.; Sun, R.; Huang, B.; Dong, X.; Xiao, Q.; Zhang, Q.; Lu, T.; Yue, L.; Chen, S.; Li, X.; Sun, Y.; Li, L.; Xu, L.; Li, Y.; Yang, M.; Xue, Z.; Liang, S.; Ding, X.; Yuan, C.; Peng, L.; Liu, W.; Yi, X.; Lyu, M.; Xiao, G.; Xu, X.; Ge, W.; He, J.; Fan, J.; Wu, J.; Luo, M.; Chang, X.; Pan, H.; Cai, X.; Zhou, J.; Yu, J.; Gao, H.; Xie, M.; Wang, S.; Ruan, G.; Chen, H.; Su, H.; Mei, H.; Luo, D.; Zhao, D.; Xu, F.; Li, Y.; Zhu, Y.; Xia, J.; Hu, Y.; Guo, T., Multi-organ proteomic landscape of COVID-19 autopsies. *Cell* **2021**, *184*, (3), 775-791.e14.
7. Nusinow, D. P.; Szpyt, J.; Ghandi, M.; Rose, C. M.; McDonald, E. R.; Kalocsay, M.; Jané-Valbuena, J.; Gelfand, E.; Schweppe, D. K.; Jedrychowski, M.; Golji, J.; Porter, D. A.; Rejtár, T.; Wang, Y. K.; Kryukov, G. V.; Stegmeier, F.; Erickson, B. K.; Garraway, L. A.; Sellers, W. R.; Gygi, S. P., Quantitative Proteomics of the Cancer Cell Line Encyclopedia. *Cell* **2020**, *180*, (2), 387-402.e16.
